# Supplementary material
Source: PubMed Central journal article supplement (PMC4234734)
Supplement: supp_140764_diet-salvado-3-at.pdf [file supp_140764_diet-salvado-3-at.pdf]

**Appendix 3: Adherence to Mediterranean diet among study participants without metabolic syndrome at baseline (as supplied by the authors)**

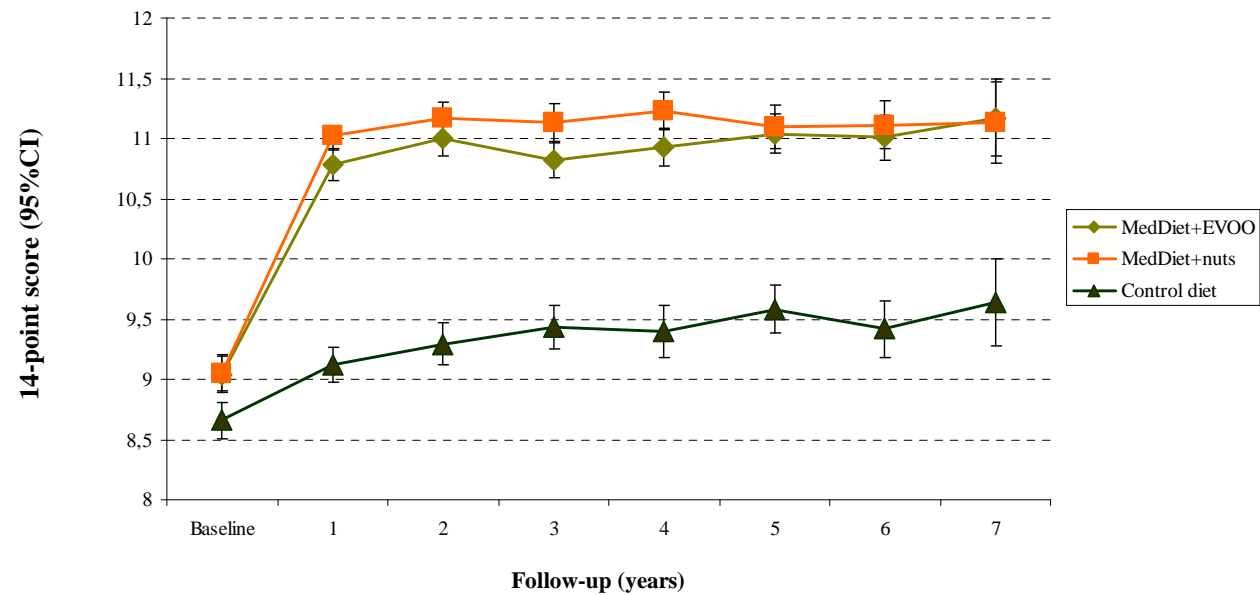

|                     | Baseline | 1 year | 2 years | 3 years | 4 years | 5 years | 6 years | 7 years |
|---------------------|----------|--------|---------|---------|---------|---------|---------|---------|
| <b>MedDiet+EVOO</b> | 663      | 640    | 601     | 576     | 461     | 403     | 300     | 119     |
| <b>MedDiet+nuts</b> | 662      | 625    | 571     | 534     | 422     | 389     | 291     | 113     |
| <b>Control diet</b> | 594      | 491    | 404     | 371     | 288     | 286     | 202     | 86      |
