# Supplementary material
Source: PubMed Central journal article supplement (PMC4234734)
Supplement: supp_140764_diet-salvado-5-at.pdf [file supp_140764_diet-salvado-5-at.pdf]

**Appendix 5: Baseline means values (95%CI) and changes at 1, 3, 5 and 7 years of follow-up of body weight, and physical activity on participants without and with metabolic syndrome at baseline (as supplied by the authors)**

|                                         | Individuals with metabolic syndrome at baseline |                            |                            |             | Individuals without metabolic syndrome at baseline |                            |                            |             |
|-----------------------------------------|-------------------------------------------------|----------------------------|----------------------------|-------------|----------------------------------------------------|----------------------------|----------------------------|-------------|
|                                         | MedDiet+E<br>VOO<br>n=663                       | MedDiet+n<br>uts<br>n=662  | Control<br>group<br>n=594  | P-<br>value | MedDiet+E<br>VOO<br>n=1236                         | MedDiet+n<br>uts<br>n=1062 | Control<br>group<br>n=1094 | P-<br>value |
| <b>Total body weight (kg)</b>           |                                                 |                            |                            |             |                                                    |                            |                            |             |
| Baseline                                | 73.4 (72.5-74.2)                                | 72.3 (71.5-73.8)           | 73.0 (72.1-73.8)           | 0.2         | 78.5 (77.8-79.1)                                   | 79.2 (78.5-79.9)           | 79.1 (78.4-79.9)           | 0.3         |
| 1 year                                  | -0.1 (-0.3-0.1)                                 | 0.2 (-0.1-0.4)             | -0.0 (-0.3-0.3)            | 0.3         | -0.2 (-0.4, -0.0)                                  | -0.1 (-0.3, 0.6)           | -0.3 (-0.5, -0.1)          | 0.5         |
| 3 years                                 | -0.2 (-0.6-0.1)                                 | 0.3 (-0.0-0.6)             | 0.0 (-0.4-0.5)             | 0.1         | -0.6 (-0.9, -0.4)                                  | -0.4 (-0.7, -0.1)          | -0.6 (-1.0, -0.2)          | 0.5         |
| 5 years                                 | -0.2 (-0.6-0.3)                                 | 0.2 (-0.2-0.6)             | 0.4 (-0.9-0.1)             | 0.2         | -1.0 (-1.3, -0.6)                                  | -0.5 (-1.0, -0.1)          | -0.6 (-1.1, -0.2)          | 0.3         |
| 7 years                                 | -0.2 (-1.1-0.6)                                 | 0.6 (-0.3-1.5)             | 0.5 (-0.4-1.5)             | 0.4         | -0.6 (-1.3, 0.1)                                   | -1.1 (-1.9, -0.2)          | -0.5 (-1.4, 0.3)           | 0.6         |
| <b>Physical activity (METS/min/day)</b> |                                                 |                            |                            |             |                                                    |                            |                            |             |
| Baseline                                | 270 (252-289)                                   | 297 (277-318) <sup>a</sup> | 250 (229-270) <sup>b</sup> | 0.004       | 219 (206-232) <sup>a</sup>                         | 223 (210-237) <sup>a</sup> | 192 (177-207) <sup>b</sup> | 0.003       |
| 1 year                                  | 18 (-3-40)                                      | -8 (-30-15)                | 9 (-13-30)                 | 0.2         | 19 (3, 34)                                         | 6 (-7, 19)                 | 11 (-5, 27)                | 0.5         |
| 3 years                                 | 18 (-5-41)                                      | -1 (-25-23)                | 18 (-15-51)                | 0.5         | 20 (5, 36)                                         | 16 (-0.6, 33)              | 13 (-5, 31)                | 0.8         |
| 5 years                                 | -7 (-36-22)                                     | -5 (-35-25)                | 4 (-28-37)                 | 0.9         | 29 (11, 46)                                        | 7 (-14, 29)                | 5 (-18, 28)                | 0.2         |
| 7 years                                 | -22 (-78-35)                                    | -41 (-100-19)              | -69 (-139-1.3)             | 0.6         | 11 (-23, 45)                                       | -11 (-55, 33)              | -2 (-49, 28)               | 0.6         |

Abbreviations: MedDiet, Mediterranean Diet; EVOO, extra-virgin oil. Changes were calculated between baseline and each of the time points. P-values for comparisons between intervention groups was tested by analysis of variance (ANOVA) followed by post-hoc tests with Scheffe correction. P<sup>a</sup>vs<sup>b</sup><0.005 by post-hoc tests with Scheffe correction.
