# Supplementary material
Source: PubMed Central journal article supplement (PMC4234734)
Supplement: supp_140764_diet-salvado-6-at.pdf [file supp_140764_diet-salvado-6-at.pdf]

**Appendix 6: Baseline characteristics of participants without metabolic syndrome at baseline (as supplied by the authors)**

|                                                      | Study group             |                         |                         |
|------------------------------------------------------|-------------------------|-------------------------|-------------------------|
|                                                      | MedDiet+EVOO<br>(n=663) | MedDiet+nuts<br>(n=662) | Control diet<br>(n=594) |
| Age, years, mean (SD)                                | 66.8 (6.0)              | 66.3 (6.0)              | 67.5 (6.4)              |
| Men % (No.)                                          | 48.1 (319)              | 50.0 (331)              | 43.9 (261)              |
| Smoking habit                                        |                         |                         |                         |
| Current smokers, % (No.)                             | 16.7 (111)              | 16.0 (106)              | 15.0 (89)               |
| Former smokers, % (No.)                              | 24.9 (165)              | 26.6 (176)              | 25.9 (154)              |
| BMI, kg/m <sup>2</sup> – mean (SD)                   | 28.4 (3.5)              | 28.1 (3.5)              | 28.6 (3.6)              |
| Waist circumference, cm – mean (SD)                  | 95.6 (9.9)              | 94.5 (9.6)              | 95.1 (9.6)              |
| Physical activity, METs – mean (SD)                  | 270 (242)               | 297 (272)               | 250 (247)               |
| Mediterranean diet score, 0 to 14 points - mean (SD) | 9.0 (2.0)               | 9.1 (1.9)               | 8.7 (1.9)               |
| Type 2 diabetes mellitus prevalence, % (No.)         | 24.6 (163)              | 27.0 (179)              | 25.9 (154)              |
| <b>Metabolic syndrome components<sup>a</sup></b>     |                         |                         |                         |
| Abdominal obesity, % (No.)                           | 45.5 (300)              | 39.9 (263)              | 46.7 (274)              |
| Hypertriglyceridemia, % (No.)                        | 5.9 (39)                | 6.2 (41)                | 3.7 (22)                |
| Low HDL-cholesterol level, % (No.)                   | 3.2 (21)                | 3.9 (26)                | 2.2 (13)                |
| High blood pressure, % (No.)                         | 85.8 (567)              | 87.2 (577)              | 87.7 (521)              |
| High fasting plasma glucose, % (no)                  | 29.3 (194)              | 32.7 (215)              | 32.8 (194)              |
| <b>Use of medications</b>                            |                         |                         |                         |
| Antihypertensive agents, % (No.)                     | 63.2 (419)              | 63.3(419)               | 68.9 (409)              |
| Statins, % (No.)                                     | 44.2 (293)              | 40.9 (271)              | 42.8 (254)              |
| Fibrates, % (No.)                                    | 0.0 (0)                 | 0.1 (1)                 | 0.0 (0)                 |
| Insulin, % (No.)                                     | 3.8 (25)                | 4.5 (30)                | 4.7 (28)                |
| Oral hypoglycaemic agents, % (no)                    | 12.1 (80)               | 13.0 (86)               | 14.8 (88)               |
| Aspirin or antiplatelet drugs, % (no)                | 15.4 (102)              | 16.2 (107)              | 15.0 (89)               |

Abbreviations: BMI, body mass index; HDL, high-density lipoprotein; MedDiet, Mediterranean diet; EVOO, extra virgin olive oil.

<sup>a</sup>The metabolic syndrome components are defined according to update harmonizing criteria.
