# Supplementary material
Source: PubMed Central journal article supplement (PMC4234734)
Supplement: supp_140764_diet-salvado-7-at.pdf [file supp_140764_diet-salvado-7-at.pdf]

**Appendix 7: Cumulative incidence (95% confidence intervals) of metabolic syndrome and its components by intervention group (as supplied by the authors)**

|                                                                       | MedDiet+EVOO group | MedDiet+nuts group | Control diet group | P-value |
|-----------------------------------------------------------------------|--------------------|--------------------|--------------------|---------|
| <b>Incidence of metabolic syndrome and its components<sup>a</sup></b> |                    |                    |                    |         |
| <b>Free of metabolic syndrome at baseline</b>                         | n=663              | n=662              | n=594              |         |
| Cumulative incidence                                                  | 49.6 (45.8-53.4)   | 50.3 (46.5-54.1)   | 50.2 (46.1-54.2)   | 1.0     |
| <b>Free of central obesity at baseline</b>                            | n=486              | n=522              | n=407              |         |
| Cumulative incidence                                                  | 43.8 (39.4-48.2)   | 45.8 (41.5-50.1)   | 42.3 (37.5-47.1)   | 0.6     |
| <b>Free of hypertriglyceridemia at baseline</b>                       | n=1264             | n=1177             | n=1156             |         |
| Cumulative incidence                                                  | 33.8 (31.2-36.4)   | 31.5 (28.9-34.2)   | 35.4 (32.6-38.1)   | 0.1     |
| <b>Free of low HDL-cholesterol at baseline</b>                        | n=1346             | n=1246             | n=1226             |         |
| Cumulative incidence                                                  | 31.4 (28.9-33.8)   | 33.4(30.8-36.0)    | 30.3 (27.8-32.9)   | 0.3     |
| <b>Free of high blood pressure at baseline</b>                        | n=130              | n=117              | n=102              |         |
| Cumulative incidence                                                  | 84.6 (78.4-90.8)   | 78.6 (71.2-86.1)   | 78.4 (70.4-86.4)   | 0.4     |
| <b>Free of high fasting plasma glucose at baseline</b>                | n=666              | n=627              | n=593              |         |
| Cumulative incidence                                                  | 43.8 (40.1-47.6)   | 46.7 (42.8-50.6)   | 46.9 (42.9-50.9)   | 0.5     |

Data are expressed as percentage (No.). Abbreviations: MedDiet=Mediterranean diet. EVOO=Extra-virgin olive oil. HDL, high-density lipoprotein. <sup>a</sup>The metabolic syndrome components were defined according to update harmonizing criteria.
