# Supplementary material
Source: PubMed Central journal article supplement (PMC4234734)
Supplement: supp_140764_diet-salvado-8-at.pdf [file supp_140764_diet-salvado-8-at.pdf]

**Appendix 8: Risk of incident metabolic syndrome and its components by group (as supplied by the authors)**

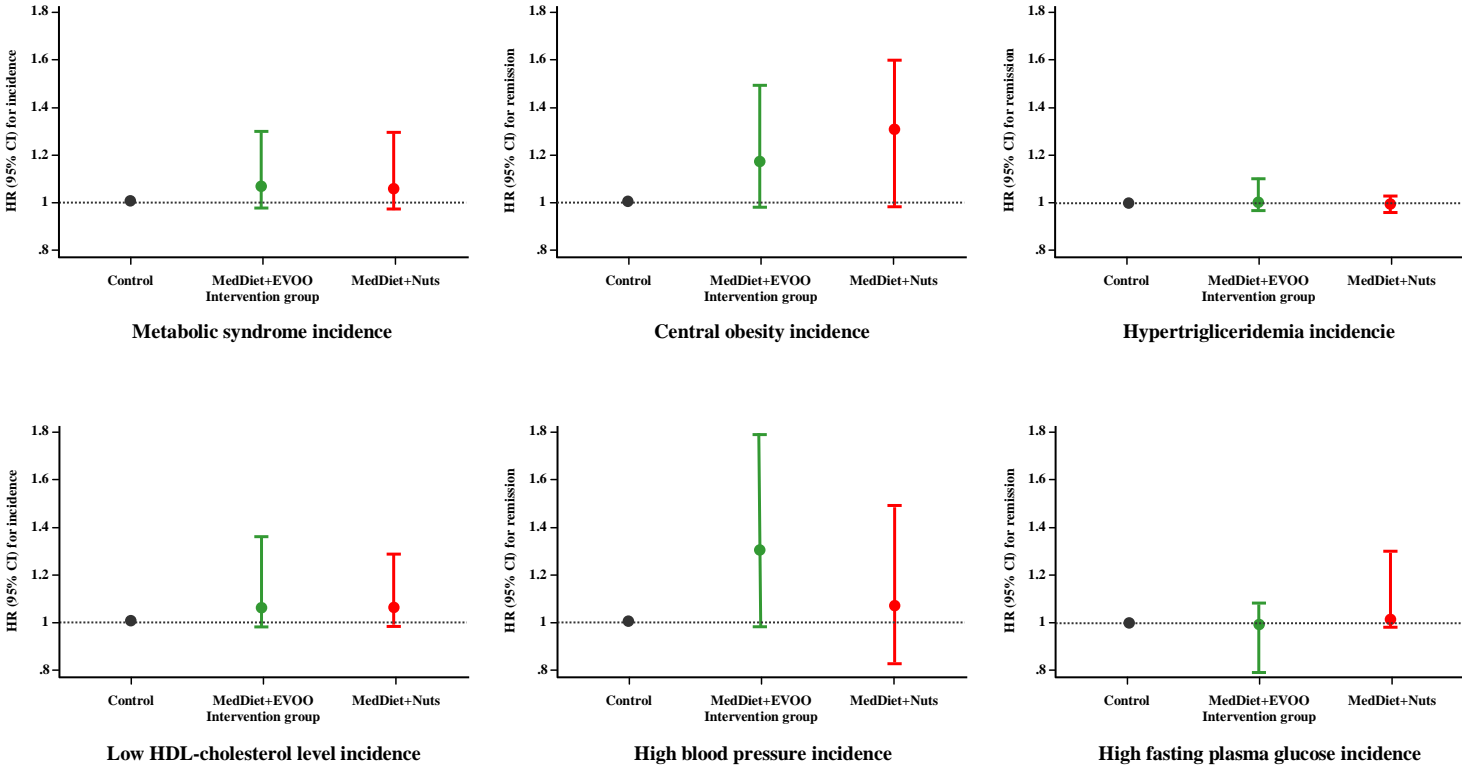

Abbreviations: MedDiet, Mediterranean diet; EVOO, Extra-virgin olive oil; HDL, High-density lipoprotein.
