# Supplementary material
Source: PubMed Central journal article supplement (PMC4234734)
Supplement: supp_140764_diet-salvado-10-at.pdf [file supp_140764_diet-salvado-10-at.pdf]

**Appendix 10: Cumulative reversion (95% confidence intervals) of metabolic syndrome and its components by intervention group (as supplied by the authors)**

|                                                                       | MedDiet+EVOO group | MedDiet+nuts group | Control diet group | P-value |
|-----------------------------------------------------------------------|--------------------|--------------------|--------------------|---------|
| <b>Reversion of metabolic syndrome and its components<sup>a</sup></b> |                    |                    |                    |         |
| <b>Metabolic syndrome at baseline</b>                                 | n=1 236            | n=1 062            | n=1 094            |         |
| Cumulative reversion                                                  | 30.8 (28.3-33.4)   | 30.6(27.8-33.4)    | 23.0 (20.5-25.5)   | <0.001  |
| <b>Central obesity at baseline</b>                                    | n=1412             | n=1205             | n=1234             |         |
| Cumulative reversion                                                  | 22.0 (19.9-24.2)   | 20.7 (18.5-23.0)   | 17.0 (14.9-19.1)   | 0.003   |
| <b>Hypertriglyceridemia at baseline</b>                               | n=655              | n=569              | n=576              |         |
| Cumulative reversion                                                  | 61.4 (57.6-65.1)   | 60.3 (56.3-64.3)   | 57.8 (53.8-61.8)   | 0.4     |
| <b>Low HDL-cholesterol at baseline</b>                                | n=559              | n=492              | n=500              |         |
| Cumulative reversion                                                  | 50.8 (46.7-54.9)   | 48.0 (43.6-52.4)   | 49.8 (45.4-54.2)   | 0.7     |
| <b>Hypertension at baseline</b>                                       | n=1886             | n=1792             | n=1861             |         |
| Cumulative reversion                                                  | 8.5 (7.3-9.8)      | 8.5 (7.3-9.9)      | 7.6 (6.4-8.9)      | 0.5     |
| <b>High fasting plasma glucose at baseline</b>                        | n=1297             | n=1174             | n=1241             |         |
| Cumulative reversion                                                  | 17.9 (15.8-20.0)   | 17.0 (14.8-19.1)   | 13.8 (11.9-15.7)   | 0.01    |

Data are expressed as percentage (No.). Abbreviations: MedDiet=Mediterranean diet. EVOO=Extra-virgin olive oil. HDL, high-density lipoprotein. <sup>a</sup>The metabolic syndrome components were defined according to update harmonizing criteria.
