# Supplementary material
Source: PubMed Central journal article supplement (PMC4234734)

## Appendix 1: Flow of participants through the PREDIMED trial (as supplied by the authors)

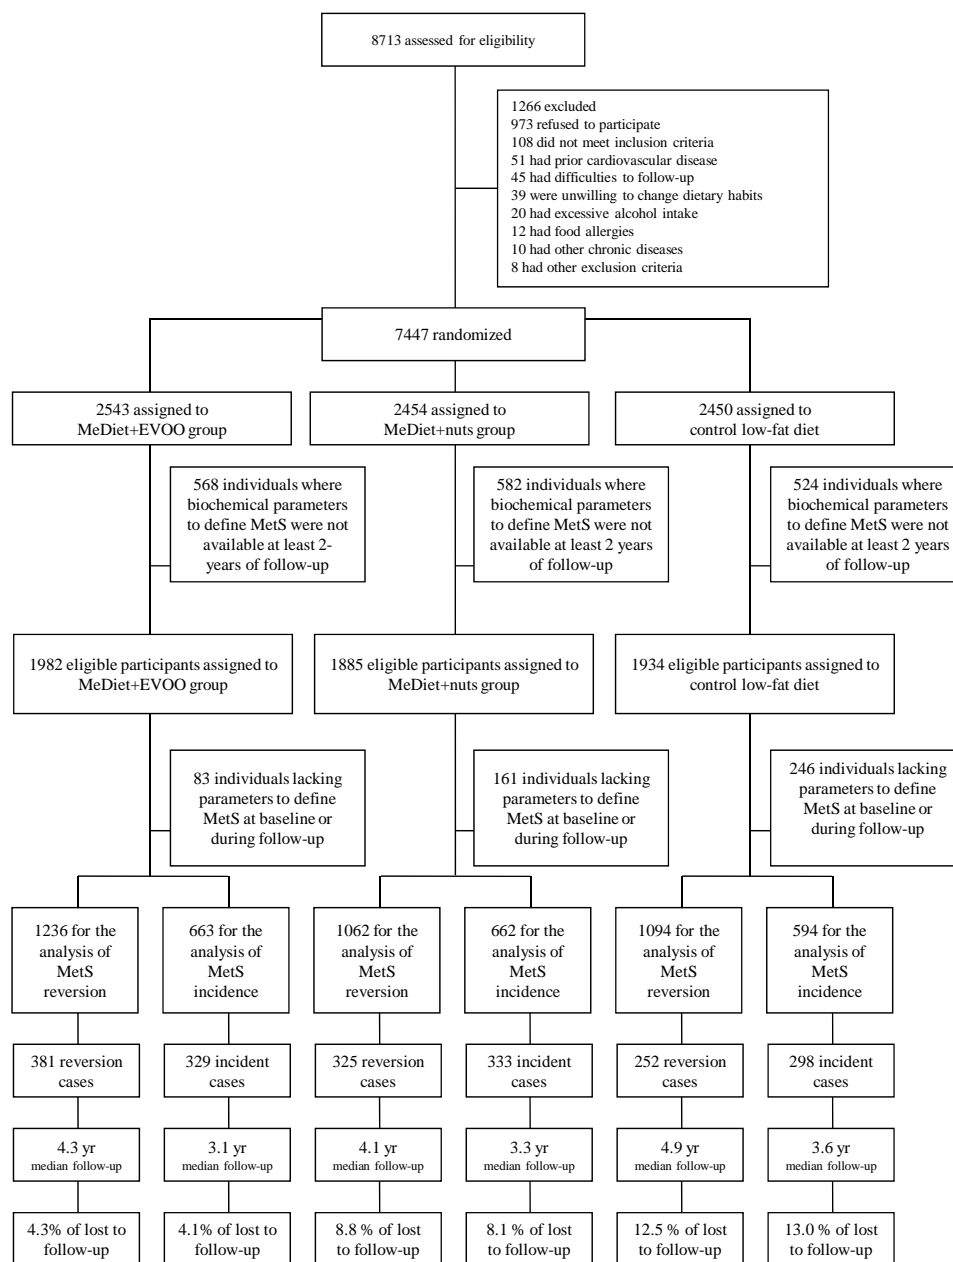

Supplement: supp_140764_diet-salvado-1-at.pdf [file supp_140764_diet-salvado-1-at.pdf]
